# Supplementary material for: Establishing New Norms for Developmental Milestones
Source: Oxford University Press journal article supplement (doi:10.1542/peds.2019-0374), 2019-11-14
Supplement: peds_20190374supplementarydata.xlsx [file peds_20190374supplementarydata.xlsx]

## Sheet: Cover
Milestones normative data & visualization tool
Version 1.0 -January, 2019
Created by:
R Christopher Sheldrick
Patrick Vivier
Blythe Berger
Lauren Schclichting
Ailis Clyne
With generous support from:
NICHD Grant R01 HD072778
David and Lucille Packard Foundation
https://creativecommons.org/licenses/by/4.0/

## Sheet: Dashboard
Milestone question #:	17	[enter # from 1-54]
	26
Display frequencies from sample in:
Minnesota:		1	enter 0 or 1
Rhode Island:		1			7.87758	6.45654	0.5	"very much"
Display expected normative curves:					1.15759	0.948771	0.75	at least "somewhat"
original publication:		1	enter 0 or 1		1.32769	1.08819	0.9
updated publication:		1
https://www.cdc.gov/ncbddd/actearly/milestones/index.html

## Sheet: dataToDisplay
	MS-Q																															#NUM!	#NUM!	#NUM!		#NUM!	#NUM!	#NUM!		#NUM!	#NUM!	#NUM!
	17				Question #9 on 6-mo form; #3 on 9-mo form; #1 on 12-mo form																											By months of age, we expect that:
range:	[1-54]																										●					#NUM!
																																#NUM!
	Expected parameters																															#NUM!
	Published	Updated							2 only	1 or 2																6						Picks up food and eats it
Include?	1	1						0.5	7.87758	6.45654						5																In comparison, the CDC states that									While the AAP's Bright Futures recommends asking whether child:
n								0.75	9.03517	7.40531						14																●by 6 months, most children: 'Brings things to mouth'									●'Puts things in her mouth' at 6 months
screens								0.9	10.3629	8.4935						#REF!	1		1
alpha1:	11.001	14.945																														●by 6 months, parents should 'act early' if: 'Has difficulty getting things to mouth'
alpha2:	12.574	16.539														display observed values				Observed
beta:	6.304	8.013																		Response=2												Response=1												Response=0
	response = 2					response = 1					response = 0					Pub	MN	MA	RI	Pub			MN			MA SESAW			RI			Pub			MN			MA SESAW			RI			Pub			MN
Month	Pub	UpD	MN	MA	RI	Pub	UpD	MN	MA	RI	Pub	UpD	MN	MA	RI					Pr	LB	UB	Pr	LB	UB	Pr	LB	UB	Pr	LB	UB	Pr	LB	UB	Pr	LB	UB	Pr	LB	UB	Pr	LB	UB	Pr	LB	UB	Pr	LB	UB
1	3.46083e-06	6.56453e-08	0	0	0	1.32239e-05	2.57553e-07	0	0	0	0.999983	1	0	0	0	#REF!	0	0	0				-1	0	0	-1	0	0	-1	0	0				-1	0	0	-1	0	0	-1	0	0				-1	0	0
2	0.000273373	1.6957e-05	0	0	0	0.00104321	6.65237e-05	0	0	0	0.998683	0.999917	0	0	0	#REF!	0	0	0				-1	0	0	-1	0	0	-1	0	0				-1	0	0	-1	0	0	-1	0	0				-1	0	0
3	0.00351096	0.000436703	0	0	0	0.0131916	0.00170969	0	0	0	0.983297	0.997854	0	0	0	#REF!	0	0	0				-1	0	0	-1	0	0	-1	0	0				-1	0	0	-1	0	0	-1	0	0				-1	0	0
4	0.0211487	0.00436126	0	0	0	0.0731877	0.0167498	0	0	0	0.905664	0.978889	0	0	0	#REF!	0	0	0				-1	0	0	-1	0	0	-1	0	0				-1	0	0	-1	0	0	-1	0	0				-1	0	0
5	0.0810546	0.0255167	0	0	0	0.217309	0.0886798	0	0	0	0.701637	0.885803	0	0	0	#REF!	1	0	1				0.12766	0.0599211	0.0847204	-1	0	0	0	0	0				0.234043	0.0811852	0.0985835	-1	0	0	0	0	0				0.638298	0.105592	0.0966196
6	0.217763	0.101412	0	0	0	0.355273	0.255766	0	0	0	0.426963	0.642821	0	0	0	#REF!	1	0	1				0.158172	0.0170044	0.0181883	-1	0	0	0	0	0				0.263035	0.0207573	0.0215751	-1	0	0	0	0	0				0.578793	0.0238346	0.0235633
7	0.423851	0.279605	0	0	0	0.356209	0.37686	0	0	0	0.21994	0.343536	0	0	0	#REF!	1	0	1				0.37931	0.067002	0.0705825	-1	0	0	0	0	0				0.325123	0.0639128	0.0691091	-1	0	0	0	0	0				0.295567	0.0618236	0.0679055
8	0.630602	0.530852	0	0	0	0.261057	0.316963	0	0	0	0.108341	0.152185	0	0	0	#REF!	1	0	1				0.717172	0.0682012	0.0615704	-1	0	0	0	0	0				0.212121	0.0547597	0.063592	-1	0	0	0	0	0				0.0707071	0.0315141	0.0450824
9	0.78199	0.744095	0	0	0	0.163344	0.190613	0	0	0	0.0546656	0.0652923	0	0	0	#REF!	1	0	1				0.826165	0.0190199	0.0178686	-1	0	0	0.780891	0.013938	0.0134764				0.128435	0.015664	0.0169792	-1	0	0	0.158308	0.0118323	0.0123948				0.0454002	0.00946603	0.0110979
10	0.874516	0.8712	0	0	0	0.096581	0.0996467	0	0	0	0.0289026	0.0291529	0	0	0	#REF!	1	0	1				0.89899	0.0506766	0.0382114	-1	0	0	0.877551	0.0342847	0.0291079				0.0606061	0.0289011	0.0428668	-1	0	0	0.0907029	0.0251124	0.0307596				0.040404	0.0228016	0.0376532
11	0.927057	0.935555	0	0	0	0.0568849	0.0506465	0	0	0	0.0160584	0.013798	0	0	0	#REF!	1	0	1				0.985714	0.062758	0.0139241	-1	0	0	0.937107	0.0497267	0.0323242				0.0142857	0.0139241	0.062758	-1	0	0	0.0503145	0.0283449	0.0464161				0	0	0.0513338
12	0.956514	0.966836	0	0	0	0.0341442	0.0262453	0	0	0	0.00934198	0.00691889	0	0	0	#REF!	1	0	1				0.961114	0.00968788	0.00823109	-1	0	0	0.928916	0.0196544	0.0165346				0.0336311	0.00763669	0.00911403	-1	0	0	0.0590361	0.0150454	0.0182648				0.00525486	0.00273216	0.00438772
13	0.973285	0.982258	0	0	0	0.0210541	0.0140864	0	0	0	0.00566121	0.00365521	0	0	0	#REF!	1	0	1				0.984694	0.028771	0.0121384	-1	0	0	0.917431	0.0683911	0.0441168				0.0153061	0.0121384	0.028771	-1	0	0	0.0733945	0.0411765	0.0661064				0	0	0.0186448
14	0.983087	0.990124	0	0	0	0.0133572	0.00785382	0	0	0	0.00355578	0.00202175	0	0	0	#REF!	1	0	1				0.964789	0.0450454	0.0236812	-1	0	0	0.916667	0.0808557	0.049171				0.0352113	0.0236812	0.0450454	-1	0	0	0.047619	0.034494	0.0698379				0	0	0.0256435
15	0.988986	0.994295	0	0	0	0.00870903	0.00454134	0	0	0	0.00230458	0.00116414	0	0	0	#REF!	0	0	0				-1	0	0	-1	0	0	-1	0	0				-1	0	0	-1	0	0	-1	0	0				-1	0	0
16	0.992641	0.99659	0	0	0	0.00582389	0.00271516	0	0	0	0.00153544	0.00069441	0	0	0	#REF!	0	0	0				-1	0	0	-1	0	0	-1	0	0				-1	0	0	-1	0	0	-1	0	0				-1	0	0
17	0.994966	0.9979	0	0	0	0.00398533	0.00167305	0	0	0	0.00104826	0.000427325	0	0	0	#REF!	0	0	0				-1	0	0	-1	0	0	-1	0	0				-1	0	0	-1	0	0	-1	0	0				-1	0	0
18	0.996484	0.99867	0	0	0	0.00278468	0.00105925	0	0	0	0.000731338	0.000270343	0	0	0	#REF!	0	0	0				-1	0	0	-1	0	0	-1	0	0				-1	0	0	-1	0	0	-1	0	0				-1	0	0
19	0.997497	0.999137	0	0	0	0.00198282	0.000687212	0	0	0	0.000520217	0.000175308	0	0	0	#REF!	0	0	0				-1	0	0	-1	0	0	-1	0	0				-1	0	0	-1	0	0	-1	0	0				-1	0	0
20	0.998187	0.999428	0	0	0	0.0014362	0.000455766	0	0	0	0.000376545	0.000116232	0	0	0	#REF!	0	0	0				-1	0	0	-1	0	0	-1	0	0				-1	0	0	-1	0	0	-1	0	0				-1	0	0
21	0.998667	0.999613	0	0	0	0.00105655	0.000308353	0	0	0	0.000276874	7.86237e-05	0	0	0	#REF!	0	0	0				-1	0	0	-1	0	0	-1	0	0				-1	0	0	-1	0	0	-1	0	0				-1	0	0
22	0.999005	0.999733	0	0	0	0.000788327	0.000212433	0	0	0	0.000206515	5.41595e-05	0	0	0	#REF!	0	0	0				-1	0	0	-1	0	0	-1	0	0				-1	0	0	-1	0	0	-1	0	0				-1	0	0
23	0.999248	0.999813	0	0	0	0.000595846	0.000148789	0	0	0	0.000156054	3.79306e-05	0	0	0	#REF!	0	0	0				-1	0	0	-1	0	0	-1	0	0				-1	0	0	-1	0	0	-1	0	0				-1	0	0
24	0.999425	0.999867	0	0	0	0.00045573	0.000105802	0	0	0	0.000119336	2.69704e-05	0	0	0	#REF!	0	0	0				-1	0	0	-1	0	0	-1	0	0				-1	0	0	-1	0	0	-1	0	0				-1	0	0
25	0.999555	0.999904	0	0	0	0.000352382	7.6287e-05	0	0	0	9.22613e-05	1.9446e-05	0	0	0	#REF!	0	0	0				-1	0	0	-1	0	0	-1	0	0				-1	0	0	-1	0	0	-1	0	0				-1	0	0
26	0.999653	0.99993	0	0	0	0.000275224	5.57155e-05	0	0	0	7.20527e-05	1.42018e-05	0	0	0	#REF!	0	0	0				-1	0	0	-1	0	0	-1	0	0				-1	0	0	-1	0	0	-1	0	0				-1	0	0
27	0.999726	0.999948	0	0	0	0.00021697	4.11765e-05	0	0	0	5.67978e-05	1.04956e-05	0	0	0	#REF!	0	0	0				-1	0	0	-1	0	0	-1	0	0				-1	0	0	-1	0	0	-1	0	0				-1	0	0
28	0.999782	0.999961	0	0	0	0.000172529	3.07678e-05	0	0	0	4.51616e-05	7.84242e-06	0	0	0	#REF!	0	0	0				-1	0	0	-1	0	0	-1	0	0				-1	0	0	-1	0	0	-1	0	0				-1	0	0
29	0.999826	0.999971	0	0	0	0.000138297	2.32265e-05	0	0	0	3.61994e-05	5.92016e-06	0	0	0	#REF!	0	0	0				-1	0	0	-1	0	0	-1	0	0				-1	0	0	-1	0	0	-1	0	0				-1	0	0
30	0.999859	0.999978	0	0	0	0.00011169	1.77015e-05	0	0	0	2.9234e-05	4.51187e-06	0	0	0	#REF!	0	0	0				-1	0	0	-1	0	0	-1	0	0				-1	0	0	-1	0	0	-1	0	0				-1	0	0
31	0.999885	0.999983	0	0	0	9.08357e-05	1.36114e-05	0	0	0	2.37749e-05	3.46935e-06	0	0	0	#REF!	0	0	0				-1	0	0	-1	0	0	-1	0	0				-1	0	0	-1	0	0	-1	0	0				-1	0	0
32	0.999906	0.999987	0	0	0	7.43612e-05	1.05541e-05	0	0	0	1.94625e-05	2.69007e-06	0	0	0	#REF!	0	0	0				-1	0	0	-1	0	0	-1	0	0				-1	0	0	-1	0	0	-1	0	0				-1	0	0
33	0.999923	0.99999	0	0	0	6.12503e-05	8.24777e-06	0	0	0	1.60308e-05	2.10222e-06	0	0	0	#REF!	0	0	0				-1	0	0	-1	0	0	-1	0	0				-1	0	0	-1	0	0	-1	0	0				-1	0	0
34	0.999936	0.999992	0	0	0	5.07439e-05	6.49306e-06	0	0	0	1.32808e-05	1.65497e-06	0	0	0	#REF!	0	0	0				-1	0	0	-1	0	0	-1	0	0				-1	0	0	-1	0	0	-1	0	0				-1	0	0
35	0.999947	0.999994	0	0	0	4.22696e-05	5.14723e-06	0	0	0	1.10628e-05	1.31194e-06	0	0	0	#REF!	0	0	0				-1	0	0	-1	0	0	-1	0	0				-1	0	0	-1	0	0	-1	0	0				-1	0	0
36	0.999955	0.999995	0	0	0	3.53921e-05	4.10714e-06	0	0	0	9.26272e-06	1.04684e-06	0	0	0	#REF!	0	0	0				-1	0	0	-1	0	0	-1	0	0				-1	0	0	-1	0	0	-1	0	0				-1	0	0
37	0.999962	0.999996	0	0	0	2.97781e-05	3.29755e-06	0	0	0	7.79339e-06	8.40486e-07	0	0	0	#REF!	0	0	0				-1	0	0	-1	0	0	-1	0	0				-1	0	0	-1	0	0	-1	0	0				-1	0	0
38	0.999968	0.999997	0	0	0	2.51703e-05	2.66309e-06	0	0	0	6.58741e-06	6.78773e-07	0	0	0	#REF!	0	0	0				-1	0	0	-1	0	0	-1	0	0				-1	0	0	-1	0	0	-1	0	0				-1	0	0
39	0.999973	0.999997	0	0	0	2.13686e-05	2.16268e-06	0	0	0	5.59242e-06	5.51227e-07	0	0	0	#REF!	0	0	0				-1	0	0	-1	0	0	-1	0	0				-1	0	0	-1	0	0	-1	0	0				-1	0	0
40	0.999977	0.999998	0	0	0	1.82164e-05	1.76557e-06	0	0	0	4.76744e-06	4.50012e-07	0	0	0	#REF!	0	0	0				-1	0	0	-1	0	0	-1	0	0				-1	0	0	-1	0	0	-1	0	0				-1	0	0
41	0.99998	0.999998	0	0	0	1.55905e-05	1.44863e-06	0	0	0	4.08021e-06	3.69227e-07	0	0	0	#REF!	0	0	0				-1	0	0	-1	0	0	-1	0	0				-1	0	0	-1	0	0	-1	0	0				-1	0	0
42	0.999983	0.999999	0	0	0	1.33933e-05	1.19425e-06	0	0	0	3.50517e-06	3.04393e-07	0	0	0	#REF!	0	0	0				-1	0	0	-1	0	0	-1	0	0				-1	0	0	-1	0	0	-1	0	0				-1	0	0
43	0.999985	0.999999	0	0	0	1.1547e-05	9.89033e-07	0	0	0	3.02195e-06	2.52086e-07	0	0	0	#REF!	0	0	0				-1	0	0	-1	0	0	-1	0	0				-1	0	0	-1	0	0	-1	0	0				-1	0	0
44	0.999987	0.999999	0	0	0	9.98915e-06	8.22635e-07	0	0	0	2.61425e-06	2.09674e-07	0	0	0	#REF!	0	0	0				-1	0	0	-1	0	0	-1	0	0				-1	0	0	-1	0	0	-1	0	0				-1	0	0
45	0.999989	0.999999	0	0	0	8.66969e-06	6.87071e-07	0	0	0	2.26893e-06	1.75121e-07	0	0	0	#REF!	0	0	0				-1	0	0	-1	0	0	-1	0	0				-1	0	0	-1	0	0	-1	0	0				-1	0	0
46	0.99999	0.999999	0	0	0	7.54798e-06	5.76123e-07	0	0	0	1.97537e-06	1.46843e-07	0	0	0	#REF!	0	0	0				-1	0	0	-1	0	0	-1	0	0				-1	0	0	-1	0	0	-1	0	0				-1	0	0
47	0.999992	0.999999	0	0	0	6.591e-06	4.84924e-07	0	0	0	1.72492e-06	1.23598e-07	0	0	0	#REF!	0	0	0				-1	0	0	-1	0	0	-1	0	0				-1	0	0	-1	0	0	-1	0	0				-1	0	0
48	0.999993	0.999999	0	0	0	5.77181e-06	4.09645e-07	0	0	0	1.51053e-06	1.04411e-07	0	0	0	#REF!	0	0	0				-1	0	0	-1	0	0	-1	0	0				-1	0	0	-1	0	0	-1	0	0				-1	0	0
49	0.999994	1	0	0	0	5.06829e-06	3.47258e-07	0	0	0	1.32641e-06	8.85095e-08	0	0	0	#REF!	0	0	0				-1	0	0	-1	0	0	-1	0	0				-1	0	0	-1	0	0	-1	0	0				-1	0	0
50	0.999994	1	0	0	0	4.46222e-06	2.95357e-07	0	0	0	1.16779e-06	7.52808e-08	0	0	0	#REF!	0	0	0				-1	0	0	-1	0	0	-1	0	0				-1	0	0	-1	0	0	-1	0	0				-1	0	0
51	0.999995	1	0	0	0	3.93855e-06	2.52019e-07	0	0	0	1.03074e-06	6.42349e-08	0	0	0	#REF!	0	0	0				-1	0	0	-1	0	0	-1	0	0				-1	0	0	-1	0	0	-1	0	0				-1	0	0
52	0.999996	1	0	0	0	3.48476e-06	2.15704e-07	0	0	0	9.11986e-07	5.49789e-08	0	0	0	#REF!	0	0	0				-1	0	0	-1	0	0	-1	0	0				-1	0	0	-1	0	0	-1	0	0				-1	0	0
53	0.999996	1	0	0	0	3.09046e-06	1.8517e-07	0	0	0	8.08794e-07	4.71964e-08	0	0	0	#REF!	0	0	0				-1	0	0	-1	0	0	-1	0	0				-1	0	0	-1	0	0	-1	0	0				-1	0	0
54	0.999997	1	0	0	0	2.74694e-06	1.59413e-07	0	0	0	7.18891e-07	4.06312e-08	0	0	0	#REF!	0	0	0				-1	0	0	-1	0	0	-1	0	0				-1	0	0	-1	0	0	-1	0	0				-1	0	0
55	0.999997	1	0	0	0	2.44688e-06	1.37616e-07	0	0	0	6.40364e-07	3.50756e-08	0	0	0	#REF!	0	0	0				-1	0	0	-1	0	0	-1	0	0				-1	0	0	-1	0	0	-1	0	0				-1	0	0
56	0.999997	1	0	0	0	2.18415e-06	1.19114e-07	0	0	0	5.71605e-07	3.03599e-08	0	0	0	#REF!	0	0	0				-1	0	0	-1	0	0	-1	0	0				-1	0	0	-1	0	0	-1	0	0				-1	0	0
57	0.999998	1	0	0	0	1.95355e-06	1.03364e-07	0	0	0	5.11256e-07	2.63455e-08	0	0	0	#REF!	0	0	0				-1	0	0	-1	0	0	-1	0	0				-1	0	0	-1	0	0	-1	0	0				-1	0	0
58	0.999998	1	0	0	0	1.75069e-06	8.99177e-08	0	0	0	4.58166e-07	2.29183e-08	0	0	0	#REF!	0	0	0				-1	0	0	-1	0	0	-1	0	0				-1	0	0	-1	0	0	-1	0	0				-1	0	0
59	0.999998	1	0	0	0	1.57184e-06	7.84073e-08	0	0	0	4.1136e-07	1.99845e-08	0	0	0	#REF!	0	0	0				-1	0	0	-1	0	0	-1	0	0				-1	0	0	-1	0	0	-1	0	0				-1	0	0
60	0.999998	1	0	0	0	1.41382e-06	6.8528e-08	0	0	0	3.70005e-07	1.74665e-08	0	0	0	#REF!	0	0	0				-1	0	0	-1	0	0	-1	0	0				-1	0	0	-1	0	0	-1	0	0				-1	0	0
61	0.999998	1	0	0	0	1.27392e-06	6.00269e-08	0	0	0	3.33391e-07	1.52997e-08	0	0	0	#REF!	0	0	0				-1	0	0	-1	0	0	-1	0	0				-1	0	0	-1	0	0	-1	0	0				-1	0	0
62	0.999999	1	0	0	0	1.1498e-06	5.26938e-08	0	0	0	3.0091e-07	1.34306e-08	0	0	0	#REF!	0	0	0				-1	0	0	-1	0	0	-1	0	0				-1	0	0	-1	0	0	-1	0	0				-1	0	0
63	0.999999	1	0	0	0	1.03948e-06	4.6353e-08	0	0	0	2.72039e-07	1.18145e-08	0	0	0	#REF!	0	0	0				-1	0	0	-1	0	0	-1	0	0				-1	0	0	-1	0	0	-1	0	0				-1	0	0
64	0.999999	1	0	0	0	9.41243e-07	4.08577e-08	0	0	0	2.46329e-07	1.04138e-08	0	0	0	#REF!	0	0	0				-1	0	0	-1	0	0	-1	0	0				-1	0	0	-1	0	0	-1	0	0				-1	0	0
65	0.999999	1	0	0	0	8.536e-07	3.60844e-08	0	0	0	2.23392e-07	9.19721e-09	0	0	0	#REF!	0	0	0				-1	0	0	-1	0	0	-1	0	0				-1	0	0	-1	0	0	-1	0	0				-1	0	0
66	0.999999	1	0	0	0	7.75274e-07	3.19292e-08	0	0	0	2.02894e-07	8.13815e-09	0	0	0	#REF!	0	0	0				-1	0	0	-1	0	0	-1	0	0				-1	0	0	-1	0	0	-1	0	0				-1	0	0
[truncated: 29 more columns]

## Sheet: MS-full
SWYC Milestone		SWYC age range		CDC		CDC		CDC		Bright Futures		Bright Futures		Bright Futures
#	Text	min	max	Most children:	by age:	Most children:	by age:	Act early if child can't	by age:	Ask:	at age:	Ask:	at age:	Ask:	at age:
1	Makes sounds that let you know he or she is happy or upset	1	3	Let's you know if she is happy or sad	4	Cries in different ways to show hunger, pain, or being tired	4			Has different types of cries to show hunger or when tired	2	Lets you know when she likes something	4	Let's you know when she does not like something	4
2	Seems happy to see you	1	3	Begins to smile at people	2	Smiles spontaneously, especially at people	4	Doesn't smile at people	2	Smiles	2	Smiles to get your attention	4	Likes to play with you	6
3	Follows a moving toy with his or her eyes	1	3	Begins to follow things with eyes and recognize people at a distance	2	Follows moving things with eyes from side to side	4	Doesn't watch things at they move	2
4	Turns head to find the person who is talking	1	3	Turns head toward sounds	2
5	Holds head steady when being pulled up to a sitting position	1	5	Can hold head up and begins to push up when lying on tummy	2	Holds head steady, unsupported	4	Can't hold head steady	4	Holds head up when held	2
6	Brings hands together	1	5
7	Laughs	1	5					Doesn't laugh or making squealing noises	6
8	Keeps head steady when held in a sitting position	1	5			Holds head steady, unsupported	4	Can't hold head up when pushing up when on tummy	2	Holds head up when held	2	Keeps head steady when sitting up on your lap	4
9	Makes sounds like "ga," "ma," or "ba"	1	8	Begins to babble	4	Begins to say consonant sounds (jabbering with "m," "b"	6	Doesn't coo or make sounds	4	Babbles	12
10	Looks when you call his or her name	1	8	Responds to own name	6			Doesn't respond to own name	9	Begins name recognition	6
11	Rolls over	3	8	May be able to roll over from tummy to back	4	Rolls over in both directions (front to back, back to front)	6			Begins to roll and reach for objects	4	Rolls over	6
12	Passes a toy from one hand to the other	3	8	Begins to pass things from one hand to the other	6	Moves things smoothly from one hand to another	9	Doesn't transfer toys from one hand to the other	9
13	Looks for you or another caregiver when upset	3	8							Looks at you	2	Goes to you to play and be comforted	9
14	Holds two objects and bangs them together	3	8	Bangs two things together	12	Explores things in different ways, like shaking, banging, throwing	12			Bangs toys together	12
15	Holds up arms to be picked up	5	11
16	Gets to a sitting position by him or herself	5	11	Begins to sit without support	6	Can get into sitting position	9	Doesn't sit with help	9	Sits briefly, leans forward	6	Sits well	9
17	Picks up food and eats it	5	14	Brings things to mouth	6			Has difficulty getting things to mouth	6	Puts things in her mouth	6
18	Pulls up to standing	5	14	Pulls to stand	9	Pulls up to stand, walks holding on to furniture ("cruising")	12			Stands alone	12
19	Plays games like 'peek-a-boo' or 'pat-a-cake'ּ	9	14	Plays peek-a-boo	9	Plays games such as "peek-a-boo" and "pat-a-cake"	12	Doesn't play any games involving back-and-forth play	9	Plays peek-a-boo	9, 12
20	Calls you 'mama' or 'dada' or similar name	9	17	says "mama" and "dada" and exclamations like "uh-oh!"	12			doesn't say single words like "mama" or "dada"	12	Speaks 1 to 2 words	12	Says 2 to 3 words	15
21	Looks around when you say things like 'Where's your bottle?' or "Where's your blanket?"	9	17
22	Copies sounds that you make	9	17	Babbles with expression and copies sounds he hears	4	Copies sounds and gestures of others	9	Doesn't copy others	12	Can repeat sounds	9	Tries to make the same sounds you do	12	Tries to do what you do	15
23	Walks across a room without help	9	17	Walks alone	18			Can't walk	18	Walks well	15
24	Follows directions - like 'Come here' or 'Give me the ball'	9	17	Follows simple directions like "pick up the toy"	12	Follows simple instructions	24	Doesn't follow simple instructions	24	Follows simple directions	12	Follows simple commands	15	Follows 2-step command	24
25	Runs	12	23	May walk up steps and run	18	Begins to run	24			Runs	18
26	Walks up stairs with help	12	23	May walk up steps and run	18	Walks up and down stairs holding on	24	Falls down a lot or has trouble with stairs	36	Walks up steps	18	Walks up and down stairs 1 step at a time alone while holding wall or railing	24	Walks up the stairs switching feet	48
27	Kicks a ball	14	23	Kicks a ball	24					Kicks a ball	24
28	Names at least 5 familiar objects- like ball or milk	14	23	Says several single words	18			Doesn't have at least 6 words	18	Can point to at least 2 pictures that you name when reading a book	24	Names 1 picture such as cat, dog, or ball	24
29	Names at least 5 body parts- like nose, hand, or tummy	14	29	Says several single words	18	Points to one body part	18			Points to 1 body part	18	Points to 6 body parts	30
30	Climbs up a ladder at a playground	17	29	Climbs well	36					Hops, skips, climbs	60
31	Uses words like 'me' or 'mine'	17	29	Understands the idea of "mine" and "his" or "hers"	36
32	Jumps off the ground with two feet	17	29					Can't jump in place	48	Jumps up	24	jumps up and down in place	30
33	Puts two or more words together - like 'more water' or 'go outside'	17	29	Says sentences with two to four words	24			Doesn't use 2-word phrases (for example, "drink milk")	24	When talking, puts 2 words together, like "my book"	24	when talking, puts 3 or 4 words together	30
34	Uses words to ask for help	17	29
35	Names at least one color	23	35	Begins to sort shapes and colors	24	Names some colors and some numbers	48			Names four colors	48, 60, 72
36	Tries to get you to watch by saying 'Look at me'	23	35	Points to get attention of others	18
37	Says his or her first name when asked	23	35	Says first name, age, and sex	36	Can say first and last name	48	Can't give first and last name	60	Knows her name, age, and whether she is a boy or girl	48
38	Draws lines	23	35	Makes or copies straight lines or circles	24	Scribbles on his own	18			Scribbles	15	Copies a cross	48
39	Talks so other people can understand him or her most of the time	29	47	Talks well enough for strangers to understand most of the time	36			Speaks unclearly	48	Other people can understand what your child is saying half the time	30	Usually understandable	36	Other people can understand what he is saying	48
40	Washes and dries hands without help (even if you turn on the water)	29	47
41	Asks questions beginning with 'why' or 'how - like 'why no cookie?'	29	47
42	Explains the reasons for things, like needing a sweater when it's cold	29	47
43	Compares things - using words like 'bigger' or 'shorter'	29	59	Understands the idea of "same" and "different"	48			Doesn't understand "same" and "different"	48
44	Answers questions like 'what do you do when you are cold?' or '…when you are sleep?'	29	59
45	Tells you a story from a book or tv	35	66	Tells stories	48			Can't retell a favorite story	48	Knows name of favorite book	18	Can tell a story with full sentences	60, 72
46	Draws simple shapes - like a circle or a square	35	66	Copies a circle with pencil or crayon	36	Copies a triangle and other geometric shapes	60			Copies a circle	36	Copies a cross	48	Copies squares, triangles	60, 72
47	Says words like 'feet' for more than one foot and 'men' for more than one man	35	66	Knows some basic rules of grammar, such as correctly using "he" and "she"	48			Doesn't use plurals or past tense properly	60
48	Uses words like 'yesterday' and 'tomorrow' correctly	35	66	Starts to understand time	48
49	Stays dry all night	47	66
50	Follows simple rules when playing a board game or card game	47	66	Plays board or card games	48			Doesn't play a variety of games and activities	60	Plays board or card games	48
51	Prints his or her first name	47	66	Can print some letters or numbers	60	Starts to copy some capital letters	60			Writes some letters and numbers	60, 72
52	Draws pictures you recognize	47	66					Doesn't draw pictures	60	Draws a person with 2 body parts	36	Draws a person with 3 parts	48	Draws a person with 6 body parts	60, 72
53	Stays in the lines when coloring	59	66					Has trouble scribbling	48
54	Names the days of the week in the correct order	59	66

## Sheet: MS
SWYC Milestone		SWYC age range		CDC		CDC		CDC		Bright Futures		Bright Futures		Bright Futures			#	form	#	form	#	form
#	Text	min	max	Most children:	by age:	Most children:	by age:	Act early if child can't	by age:	Ask:	at age:	Ask:	at age:	Ask:	at age:
1	Makes sounds that let you know he or she is happy or upset	1	3	Let's you know if she is happy or sad	4	Cries in different ways to show hunger, pain, or being tired	4			Has different types of cries to show hunger or when tired	2	Lets you know when she likes something	4	Let's you know when she does not like something	4		1	2					Question #1 on 2-mo form			Question #1 on 2-mo form
2	Seems happy to see you	1	3	Begins to smile at people	2	Smiles spontaneously, especially at people	4	Doesn't smile at people	2	Smiles	2	Smiles to get your attention	4	Likes to play with you	6		2	2					Question #2 on 2-mo form			Question #2 on 2-mo form
3	Follows a moving toy with his or her eyes	1	3	Begins to follow things with eyes and recognize people at a distance	2	Follows moving things with eyes from side to side	4	Doesn't watch things at they move	2								3	2					Question #3 on 2-mo form			Question #3 on 2-mo form
4	Turns head to find the person who is talking	1	3	Turns head toward sounds	2												4	2					Question #4 on 2-mo form			Question #4 on 2-mo form
5	Holds head steady when being pulled up to a sitting position	1	5	Can hold head up and begins to push up when lying on tummy	2	Holds head steady, unsupported	4	Can't hold head steady	4	Holds head up when held	2						5	2	1	4			Question #5 on 2-mo form	; #1 on 4-mo form		Question #5 on 2-mo form; #1 on 4-mo form
6	Brings hands together	1	5														6	2	2	4			Question #6 on 2-mo form	; #2 on 4-mo form		Question #6 on 2-mo form; #2 on 4-mo form
7	Laughs	1	5					Doesn't laugh or making squealing noises	6								7	2	3	4			Question #7 on 2-mo form	; #3 on 4-mo form		Question #7 on 2-mo form; #3 on 4-mo form
8	Keeps head steady when held in a sitting position	1	5	Holds head steady, unsupported	4			Can't hold head up when pushing up when on tummy	2	Holds head up when held	2	Keeps head steady when sitting up on your lap	4				8	2	4	4			Question #8 on 2-mo form	; #4 on 4-mo form		Question #8 on 2-mo form; #4 on 4-mo form
9	Makes sounds like "ga," "ma," or "ba"	1	8	Begins to babble	4	Begins to say consonant sounds (jabbering with "m," "b"	6	Doesn't coo or make sounds	4	Babbles	12						9	2	5	4	1	6	Question #9 on 2-mo form	; #5 on 4-mo form	; #1 on 6-mo form	Question #9 on 2-mo form; #5 on 4-mo form; #1 on 6-mo form
10	Looks when you call his or her name	1	8	Responds to own name	6			Doesn't respond to own name	9	Begins name recognition	6						10	2	6	4	2	6	Question #10 on 2-mo form	; #6 on 4-mo form	; #2 on 6-mo form	Question #10 on 2-mo form; #6 on 4-mo form; #2 on 6-mo form
11	Rolls over	3	8	May be able to roll over from tummy to back	4					Begins to roll and reach for objects	4	Rolls over	6			m	7	4	3	6			Question #7 on 4-mo form	; #3 on 6-mo form		Question #7 on 4-mo form; #3 on 6-mo form
12	Passes a toy from one hand to the other	3	8	Begins to pass things from one hand to the other	6			Doesn't transfer toys from one hand to the other	9							m	8	4	4	6			Question #8 on 4-mo form	; #4 on 6-mo form		Question #8 on 4-mo form; #4 on 6-mo form
13	Looks for you or another caregiver when upset	3	8							Looks at you	2	Goes to you to play and be comforted	9				9	4	5	6			Question #9 on 4-mo form	; #5 on 6-mo form		Question #9 on 4-mo form; #5 on 6-mo form
14	Holds two objects and bangs them together	3	8	Bangs two things together	12					Bangs toys together	12					m	10	4	6	6			Question #10 on 4-mo form	; #6 on 6-mo form		Question #10 on 4-mo form; #6 on 6-mo form
15	Holds up arms to be picked up	5	11														7	6	1	9			Question #7 on 6-mo form	; #1 on 9-mo form		Question #7 on 6-mo form; #1 on 9-mo form
16	Gets to a sitting position by him or herself	5	11	Can get into sitting position	9					Sits briefly, leans forward	6	Sits well	9			m	8	6	2	9			Question #8 on 6-mo form	; #2 on 9-mo form		Question #8 on 6-mo form; #2 on 9-mo form
17	Picks up food and eats it	5	14	Brings things to mouth	6			Has difficulty getting things to mouth	6	Puts things in her mouth	6					m	9	6	3	9	1	12	Question #9 on 6-mo form	; #3 on 9-mo form	; #1 on 12-mo form	Question #9 on 6-mo form; #3 on 9-mo form; #1 on 12-mo form
18	Pulls up to standing	5	14	Pulls to stand	9					Stands alone	12					m	10	6	4	9	2	12	Question #10 on 6-mo form	; #4 on 9-mo form	; #2 on 12-mo form	Question #10 on 6-mo form; #4 on 9-mo form; #2 on 12-mo form
19	Plays games like 'peek-a-boo' or 'pat-a-cake'ּ	9	14	Plays peek-a-boo	9	Plays games such as "peek-a-boo" and "pat-a-cake"	12	Doesn't play any games involving back-and-forth play	9	Plays peek-a-boo	9, 12						5	9	3	12			Question #5 on 9-mo form	; #3 on 12-mo form		Question #5 on 9-mo form; #3 on 12-mo form
20	Calls you 'mama' or 'dada' or similar name	9	17	says "mama" and "dada" and exclamations like "uh-oh!"	12			doesn't say single words like "mama" or "dada"	12	Speaks 1 to 2 words	12	Says 2 to 3 words	15				6	9	4	12	1	15	Question #6 on 9-mo form	; #4 on 12-mo form	; #1 on 15-mo form	Question #6 on 9-mo form; #4 on 12-mo form; #1 on 15-mo form
21	Looks around when you say things like 'Where's your bottle?' or "Where's your blanket?"	9	17														7	9	5	12	2	15	Question #7 on 9-mo form	; #5 on 12-mo form	; #2 on 15-mo form	Question #7 on 9-mo form; #5 on 12-mo form; #2 on 15-mo form
22	Copies sounds that you make	9	17	Babbles with expression and copies sounds he hears	4	Copies sounds and gestures of others	9	Doesn't copy others	12	Can repeat sounds	9	Tries to make the same sounds you do	12	Tries to do what you do	15		8	9	6	12	3	15	Question #8 on 9-mo form	; #6 on 12-mo form	; #3 on 15-mo form	Question #8 on 9-mo form; #6 on 12-mo form; #3 on 15-mo form
23	Walks across a room without help	9	17	Walks alone	18			Can't walk	18	Walks well	15					m	9	9	7	12	4	15	Question #9 on 9-mo form	; #7 on 12-mo form	; #4 on 15-mo form	Question #9 on 9-mo form; #7 on 12-mo form; #4 on 15-mo form
24	Follows directions - like 'Come here' or 'Give me the ball'	9	17	Follows simple directions like "pick up the toy"	12	Follows simple instructions	24	Doesn't follow simple instructions	24	Follows simple directions	12	Follows simple commands	15	Follows 2-step command	24		10	9	8	12	5	15	Question #10 on 9-mo form	; #8 on 12-mo form	; #5 on 15-mo form	Question #10 on 9-mo form; #8 on 12-mo form; #5 on 15-mo form
25	Runs	12	23	May walk up steps and run	18	Begins to run	24			Runs	18					m	9	12	6	15	1	18	Question #9 on 12-mo form	; #6 on 15-mo form	; #1 on 18-mo form	Question #9 on 12-mo form; #6 on 15-mo form; #1 on 18-mo form
26	Walks up stairs with help	12	23	May walk up steps and run	18	Walks up and down stairs holding on	24			Walks up steps	18	Walks up and down stairs 1 step at a time alone while holding wall or railing	24	Walks up the stairs switching feet	48	m	10	12	7	15	2	18	Question #10 on 12-mo form	; #7 on 15-mo form	; #2 on 18-mo form	Question #10 on 12-mo form; #7 on 15-mo form; #2 on 18-mo form
27	Kicks a ball	14	23	Kicks a ball	24					Kicks a ball	24					m	8	15	3	18			Question #8 on 15-mo form	; #3 on 18-mo form		Question #8 on 15-mo form; #3 on 18-mo form
28	Names at least 5 familiar objects- like ball or milk	14	23	Says several single words	18			Doesn't have at least 6 words	18	Can point to at least 2 pictures that you name when reading a book	24	Names 1 picture such as cat, dog, or ball	24				9	15	4	18			Question #9 on 15-mo form	; #4 on 18-mo form		Question #9 on 15-mo form; #4 on 18-mo form
29	Names at least 5 body parts- like nose, hand, or tummy	14	29	Says several single words	18	Points to one body part	18			Points to 1 body part	18	Points to 6 body parts	30				10	15	5	18	1	24	Question #10 on 15-mo form	; #5 on 18-mo form	; #1 on 24-mo form	Question #10 on 15-mo form; #5 on 18-mo form; #1 on 24-mo form
30	Climbs up a ladder at a playground	17	29	Climbs well	36					Hops, skips, climbs	60					m	6	18	2	24			Question #6 on 18-mo form	; #2 on 24-mo form		Question #6 on 18-mo form; #2 on 24-mo form
31	Uses words like 'me' or 'mine'	17	29	Understands the idea of "mine" and "his" or "hers"	36												7	18	3	24			Question #7 on 18-mo form	; #3 on 24-mo form		Question #7 on 18-mo form; #3 on 24-mo form
32	Jumps off the ground with two feet	17	29					Can't jump in place	48	Jumps up	24	jumps up and down in place	30			m	8	18	4	24			Question #8 on 18-mo form	; #4 on 24-mo form		Question #8 on 18-mo form; #4 on 24-mo form
33	Puts two or more words together - like 'more water' or 'go outside'	17	29	Says sentences with two to four words	24			Doesn't use 2-word phrases (for example, "drink milk")	24	When talking, puts 2 words together, like "my book"	24	when talking, puts 3 or 4 words together	30				9	18	5	24			Question #9 on 18-mo form	; #5 on 24-mo form		Question #9 on 18-mo form; #5 on 24-mo form
34	Uses words to ask for help	17	29														10	18	6	24			Question #10 on 18-mo form	; #6 on 24-mo form		Question #10 on 18-mo form; #6 on 24-mo form
35	Names at least one color	23	35	Begins to sort shapes and colors	24	Names some colors and some numbers	48			Names four colors	48, 60, 72						7	24	1	30			Question #7 on 24-mo form	; #1 on 30-mo form		Question #7 on 24-mo form; #1 on 30-mo form
36	Tries to get you to watch by saying 'Look at me'	23	35	Points to get attention of others	18												8	24	2	30			Question #8 on 24-mo form	; #2 on 30-mo form		Question #8 on 24-mo form; #2 on 30-mo form
37	Says his or her first name when asked	23	35	Says first name, age, and sex	36	Can say first and last name	48	Can't give first and last name	60	Knows her name, age, and whether she is a boy or girl	48						9	24	3	30			Question #9 on 24-mo form	; #3 on 30-mo form		Question #9 on 24-mo form; #3 on 30-mo form
38	Draws lines	23	35	Makes or copies straight lines or circles	24	Scribbles on his own	18			Scribbles	15	Copies a cross	48			m	10	24	4	30			Question #10 on 24-mo form	; #4 on 30-mo form		Question #10 on 24-mo form; #4 on 30-mo form
39	Talks so other people can understand him or her most of the time	29	47	Talks well enough for strangers to understand most of the time	36			Speaks unclearly	48	Other people can understand what your child is saying half the time	30	Usually understandable	36	Other people can understand what he is saying	48		5	30	1	36			Question #5 on 30-mo form	; #1 on 36-mo form		Question #5 on 30-mo form; #1 on 36-mo form
40	Washes and dries hands without help (even if you turn on the water)	29	47														6	30	2	36			Question #6 on 30-mo form	; #2 on 36-mo form		Question #6 on 30-mo form; #2 on 36-mo form
41	Asks questions beginning with 'why' or 'how - like 'why no cookie?'	29	47														7	30	3	36			Question #7 on 30-mo form	; #3 on 36-mo form		Question #7 on 30-mo form; #3 on 36-mo form
42	Explains the reasons for things, like needing a sweater when it's cold	29	47														8	30	4	36			Question #8 on 30-mo form	; #4 on 36-mo form		Question #8 on 30-mo form; #4 on 36-mo form
43	Compares things - using words like 'bigger' or 'shorter'	29	59	Understands the idea of "same" and "different"	48			Doesn't understand "same" and "different"	48								9	30	5	36	1	48	Question #9 on 30-mo form	; #5 on 36-mo form	; #1 on 48-mo form	Question #9 on 30-mo form; #5 on 36-mo form; #1 on 48-mo form
44	Answers questions like 'what do you do when you are cold?' or '…when you are sleep?'	29	59														10	30	6	36	2	48	Question #10 on 30-mo form	; #6 on 36-mo form	; #2 on 48-mo form	Question #10 on 30-mo form; #6 on 36-mo form; #2 on 48-mo form
45	Tells you a story from a book or tv	35	66	Tells stories	48			Can't retell a favorite story	48	Knows name of favorite book	18	Can tell a story with full sentences	60, 72				7	36	3	48	1	60	Question #7 on 36-mo form	; #3 on 48-mo form	; #1 on 60-mo form	Question #7 on 36-mo form; #3 on 48-mo form; #1 on 60-mo form
46	Draws simple shapes - like a circle or a square	35	66	Copies a circle with pencil or crayon	36					Copies a circle	36	Copies a cross	48	Copies squares, triangles	60, 72	m	8	36	4	48	2	60	Question #8 on 36-mo form	; #4 on 48-mo form	; #2 on 60-mo form	Question #8 on 36-mo form; #4 on 48-mo form; #2 on 60-mo form
47	Says words like 'feet' for more than one foot and 'men' for more than one man	35	66	Knows some basic rules of grammar, such as correctly using "he" and "she"	48			Doesn't use plurals or past tense properly	60								9	36	5	48	3	60	Question #9 on 36-mo form	; #5 on 48-mo form	; #3 on 60-mo form	Question #9 on 36-mo form; #5 on 48-mo form; #3 on 60-mo form
48	Uses words like 'yesterday' and 'tomorrow' correctly	35	66	Starts to understand time	48												10	36	6	48	4	60	Question #10 on 36-mo form	; #6 on 48-mo form	; #4 on 60-mo form	Question #10 on 36-mo form; #6 on 48-mo form; #4 on 60-mo form
49	Stays dry all night	47	66														7	48	5	60			Question #7 on 48-mo form	; #5 on 60-mo form		Question #7 on 48-mo form; #5 on 60-mo form
50	Follows simple rules when playing a board game or card game	47	66	Plays board or card games	48			Doesn't play a variety of games and activities	60	Plays board or card games	48						8	48	6	60			Question #8 on 48-mo form	; #6 on 60-mo form		Question #8 on 48-mo form; #6 on 60-mo form
51	Prints his or her first name	47	66	Can print some letters or numbers	60	Starts to copy some capital letters	60			Writes some letters and numbers	60, 72						9	48	7	60			Question #9 on 48-mo form	; #7 on 60-mo form		Question #9 on 48-mo form; #7 on 60-mo form
52	Draws pictures you recognize	47	66					Doesn't draw pictures	60	Draws a person with 2 body parts	36	Draws a person with 3 parts	48	Draws a person with 6 body parts	60, 72		10	48	8	60			Question #10 on 48-mo form	; #8 on 60-mo form		Question #10 on 48-mo form; #8 on 60-mo form
53	Stays in the lines when coloring	59	66					Has trouble scribbling	48								9	60					Question #9 on 60-mo form			Question #9 on 60-mo form
54	Names the days of the week in the correct order	59	66														10	60					Question #10 on 60-mo form			Question #10 on 60-mo form

## Sheet: pub_exp
	beta	alpha1	alpha2		0.25	0.5	0.75	0.9		0.25	0.5	0.75	0.9			1	2	3			1	2	3
1	2.321	-0.89	0.442		0.424522	0.681502	1.09404	1.75631		0.753595	1.20978	1.9421	3.11773		1	0.424522	0.669521	0.662269		2	0.753595	1.18851	1.17563
2	5.995	-0.299	1.478		0.792051	0.951348	1.14268	1.3725		1.06533	1.27959	1.53694	1.84605		3	0.792051	0.350633	0.229817		4	1.06533	0.471611	0.30911
3	3.982	-2	1.444		0.459253	0.605161	0.797427	1.05078		1.09061	1.43711	1.89369	2.49533		5	0.459253	0.338174	0.25335		6	1.09061	0.803078	0.601642
4	3.324	-1.32	2.033		0.483057	0.672259	0.935567	1.30201		1.32459	1.8434	2.56542	3.57023		7	0.483057	0.45251	0.366439		8	1.32459	1.24083	1.00481
5	2.874	-0.371	2.454		0.599687	0.878896	1.2881	1.88783		1.60256	2.3487	3.44224	5.04491		9	0.599687	0.688416	0.59973		10	1.60256	1.83967	1.60268
6	2.284	0.099	2.081		0.645546	1.0443	1.68936	2.73287		1.53744	2.48711	4.02339	6.50862		11	0.645546	1.04381	1.04351		12	1.53744	2.48595	2.48524
7	3.723	1.121	3.478		1.00603	1.35135	1.81519	2.43824		1.89478	2.54516	3.41877	4.59224		13	1.00603	0.809157	0.623053		14	1.89478	1.52399	1.17347
8	2.936	0.107	3.027		0.713379	1.03712	1.50777	2.19201		1.92863	2.80385	4.07627	5.92611		15	0.713379	0.79439	0.684238		16	1.92863	2.14764	1.84984
9	2.794	2.144	3.677		1.45376	2.15407	3.19173	4.72925		2.5164	3.72861	5.52475	8.18614		17	1.45376	1.73797	1.53752		18	2.5164	3.00835	2.66139
10	2.862	1.634	4.257		1.20571	1.76991	2.59813	3.8139		3.01488	4.42567	6.49663	9.53667		19	1.20571	1.39242	1.21577		20	3.01488	3.48175	3.04005
11	4.238	4.265	6.305		2.11096	2.73566	3.54522	4.59436		3.41611	4.42704	5.73713	7.43492		21	2.11096	1.43426	1.04914		22	3.41611	2.32102	1.69779
12	5.406	6.093	8.124		2.519	3.08663	3.78219	4.63447		3.66766	4.49414	5.50687	6.7478		23	2.519	1.26319	0.852289		24	3.66766	1.83921	1.24093
13	2.16	1.79	3.266		1.37725	2.29035	3.80882	6.33403		2.72759	4.53596	7.54326	12.5444		25	1.37725	2.43158	2.52521		26	2.72759	4.81566	5.0011
14	6.193	8.978	10.719		3.56907	4.26184	5.08908	6.07689		4.72766	5.64531	6.74109	8.04955		27	3.56907	1.52001	0.987809		28	4.72766	2.01343	1.30847
15	5.783	8.378	10.976		3.52104	4.2577	5.14848	6.22563		5.51794	6.67238	8.06835	9.75639		29	3.52104	1.62744	1.07715		30	5.51794	2.55042	1.68803
16	8.923	16.613	17.779		5.68992	6.43542	7.2786	8.23226		6.48421	7.33378	8.29467	9.38145		31	5.68992	1.58868	0.953655		32	6.48421	1.81046	1.08678
17	6.304	11.001	12.574		4.81054	5.72637	6.81656	8.11429		6.17392	7.34931	8.74847	10.414		33	4.81054	2.00601	1.29773		34	6.17392	2.57455	1.66553
18	6.905	12.476	13.83		5.19503	6.09097	7.14141	8.37302		6.32046	7.41049	8.6885	10.1869		35	5.19503	1.94638	1.23161		36	6.32046	2.36804	1.49842
19	5.933	10.209	12.45		4.64386	5.58852	6.72535	8.09344		6.77516	8.15338	9.81196	11.8079		37	4.64386	2.0815	1.36809		38	6.77516	3.0368	1.99598
20	3.755	6.896	8.368		4.68287	6.27444	8.40694	11.2642		6.93043	9.28588	12.4419	16.6705		39	4.68287	3.72407	2.85727		40	6.93043	5.51145	4.22863
21	3.153	5.48	7.258		4.01322	5.68612	8.05636	11.4146		7.05334	9.9935	14.1593	20.0615		41	4.01322	4.04314	3.35827		42	7.05334	7.10592	5.90224
22	2.733	3.8	6.557		2.68702	4.01651	6.00381	8.97438		7.3685	11.0143	16.464	24.6101		43	2.68702	3.31679	2.97058		44	7.3685	9.09548	8.14608
23	9.663	23.319	24.067		9.96953	11.1699	12.5149	14.0218		10.7719	12.0689	13.5221	15.1503		45	9.96953	2.54535	1.50689		46	10.7719	2.75021	1.62817
24	4.202	8.29	10.842		5.53682	7.19129	9.34013	12.1311		10.163	13.1998	17.144	22.2669		47	5.53682	3.80331	2.79094		48	10.163	6.98106	5.12284
25	10.163	26.071	27.468		11.6719	13.0044	14.4889	16.143		13.3918	14.9206	16.624	18.5217		49	11.6719	2.817	1.65403		50	13.3918	3.2321	1.89776
26	6.657	16.557	18.256		10.1973	12.027	14.185	16.7303		13.1622	15.5238	18.3093	21.5945		51	10.1973	3.98771	2.54522		52	13.1622	5.14712	3.28523
27	6.352	15.927	17.642		10.3237	12.273	14.5903	17.3451		13.5236	16.0771	19.1126	22.7213		53	10.3237	4.26655	2.75483		54	13.5236	5.58899	3.60871
28	13.355	35.719	37.098		13.3607	14.5062	15.75	17.1004		14.814	16.0842	17.4632	18.9606		55	13.3607	2.38932	1.35041		56	14.814	2.64923	1.49731
29	11.262	31.583	33.353		14.9818	16.5169	18.2094	20.0752		17.5315	19.3279	21.3084	23.4918		57	14.9818	3.22758	1.86586		58	17.5315	3.77688	2.18341
30	3.827	9.999	11.432		10.2337	13.6365	18.1709	24.213		14.8816	19.83	26.4238	35.2101		59	10.2337	7.93722	6.04211		60	14.8816	11.5422	8.78633
31	7.504	21.177	22.536		14.5224	16.812	19.4627	22.5312		17.4056	20.1499	23.3268	27.0046		61	14.5224	4.94029	3.06855		62	17.4056	5.92113	3.67778
32	6.193	17.334	18.805		13.7573	16.4277	19.6163	23.4239		17.4458	20.8321	24.8756	29.7041		63	13.7573	5.85901	3.8076		64	17.4458	7.42986	4.82845
33	11.233	32.039	34.204		15.7119	17.3262	19.1064	21.0695		19.0517	21.0091	23.1677	25.5481		65	15.7119	3.39449	1.96308		66	19.0517	4.11603	2.38036
34	7.559	20.79	23.154		13.5316	15.6483	18.0962	20.927		18.4999	21.3939	24.7405	28.6107		67	13.5316	4.56463	2.8308		68	18.4999	6.24061	3.87018
35	7.816	23.285	24.812		17.0916	19.671	22.6397	26.0564		20.7792	23.9152	27.5244	31.6783		69	17.0916	5.54811	3.41672		70	20.7792	6.74517	4.15391
36	8.337	25.336	26.877		18.3056	20.884	23.8255	27.1814		22.0221	25.1239	28.6627	32.6999		71	18.3056	5.51994	3.35588		72	22.0221	6.64062	4.0372
37	6.721	20.429	21.814		17.7452	20.8964	24.6072	28.9768		21.8061	25.6783	30.2382	35.6079		73	17.7452	6.8619	4.36968		74	21.8061	8.43218	5.36964
38	4.012	11.258	13.248		12.5818	16.545	21.7565	28.6097		20.6613	27.1695	35.7277	46.9816		75	12.5818	9.17473	6.85316		76	20.6613	15.0664	11.254
39	8.323	24.533	27.634		16.7035	19.0604	21.75	24.819		24.2447	27.6658	31.5696	36.0242		77	16.7035	5.04647	3.06903		78	24.2447	7.32484	4.45463
40	5.355	16.226	18.083		16.8594	20.6986	25.412	31.1988		23.8477	29.2782	35.9454	44.1307		79	16.8594	8.55259	5.78675		80	23.8477	12.0977	8.18537
41	10.22	32.798	34.838		22.2357	24.7592	27.5691	30.6978		27.1482	30.2291	33.6597	37.4797		81	22.2357	5.33331	3.12872		82	27.1482	6.51157	3.81993
42	11.246	35.952	38.608		22.1798	24.4559	26.9655	29.7327		28.0883	30.9707	34.149	37.6533		83	22.1798	4.78575	2.7672		84	28.0883	6.06064	3.50437
43	12.097	39.757	42.395		24.4273	26.7495	29.2926	32.0774		30.3796	33.2677	36.4304	39.8938		85	24.4273	4.8653	2.7848		86	30.3796	6.05086	3.46339
44	11.042	36.422	38.774		24.5081	27.0719	29.904	33.0323		30.3261	33.4985	37.0029	40.8738		87	24.5081	5.39587	3.12831		88	30.3261	6.67681	3.87094
45	9.051	29.756	31.912		23.7175	26.7783	30.2342	34.136		30.0968	33.9809	38.3663	43.3176		89	23.7175	6.51669	3.90184		90	30.0968	8.26949	4.95132
46	5.264	17.684	19.306		23.3529	28.7726	35.4501	43.6773		31.7804	39.156	48.2433	59.4395		91	23.3529	12.0972	8.22722		92	31.7804	16.4628	11.1962
47	5.205	17.429	19.712		23.0449	28.4603	35.1484	43.4082		35.7324	44.1295	54.4998	67.3071		93	23.0449	12.1036	8.25978		94	35.7324	18.7673	12.8073
48	6.506	22.489	24.893		26.7837	31.7107	37.5441	44.4506		38.7565	45.886	54.327	64.3208		95	26.7837	10.7604	6.90647		96	38.7565	15.5705	9.99378
49	3.974	13.94	15.214		25.3138	33.3748	44.0027	58.0149		34.8807	45.9882	60.6327	79.9407		97	25.3138	18.6889	14.0123		98	34.8807	25.752	19.3079
50	6.788	23.255	25.981		26.1553	30.7503	36.1525	42.5037		39.0813	45.9471	54.019	63.509		99	26.1553	9.99714	6.35124		100	39.0813	14.9377	9.49003
51	7.057	27.019	27.991		39.37	46.0018	53.7508	62.805		45.1838	52.795	61.6882	72.0795		101	39.37	14.3808	9.05424		102	45.1838	16.5044	10.3913
52	7.476	27.631	29.83		34.7788	40.2842	46.6612	54.0475		46.6723	54.0604	62.618	72.5304		103	34.7788	11.8823	7.38638		104	46.6723	15.9458	9.91233
53	7.699	28.632	30.927		35.7385	41.22	47.5423	54.8343		48.1499	55.5351	64.053	73.8773		105	35.7385	11.8038	7.29197		106	48.1499	15.9031	9.82435
54	6.257	23.698	25.877		37.0348	44.1432	52.616	62.715		52.4629	62.5326	74.535	88.8412		107	37.0348	15.5812	10.099		108	52.4629	22.0721	14.3062

## Sheet: update_exp
	beta	alpha1	alpha2		0.25	0.5	0.75	0.9		0.25	0.5	0.75	0.9			1	2	3			1	2	3
1	2.321	-0.89	0.442		0.424522	0.681502	1.09404	1.75631		0.753595	1.20978	1.9421	3.11773		1	0.424522	0.669521	0.662269		2	0.753595	1.18851	1.17563
2	5.995	-0.299	1.478		0.792051	0.951348	1.14268	1.3725		1.06533	1.27959	1.53694	1.84605		3	0.792051	0.350633	0.229817		4	1.06533	0.471611	0.30911
3	3.982	-2	1.444		0.459253	0.605161	0.797427	1.05078		1.09061	1.43711	1.89369	2.49533		5	0.459253	0.338174	0.25335		6	1.09061	0.803078	0.601642
4	3.324	-1.32	2.033		0.483057	0.672259	0.935567	1.30201		1.32459	1.8434	2.56542	3.57023		7	0.483057	0.45251	0.366439		8	1.32459	1.24083	1.00481
5	2.874	-0.371	2.454		0.599687	0.878896	1.2881	1.88783		1.60256	2.3487	3.44224	5.04491		9	0.599687	0.688416	0.59973		10	1.60256	1.83967	1.60268
6	2.284	0.099	2.081		0.645546	1.0443	1.68936	2.73287		1.53744	2.48711	4.02339	6.50862		11	0.645546	1.04381	1.04351		12	1.53744	2.48595	2.48524
7	3.723	1.121	3.478		1.00603	1.35135	1.81519	2.43824		1.89478	2.54516	3.41877	4.59224		13	1.00603	0.809157	0.623053		14	1.89478	1.52399	1.17347
8	2.936	0.107	3.027		0.713379	1.03712	1.50777	2.19201		1.92863	2.80385	4.07627	5.92611		15	0.713379	0.79439	0.684238		16	1.92863	2.14764	1.84984
9	3.252	3.832	5.761		2.31758	3.24901	4.55479	6.38534		4.19418	5.87981	8.2429	11.5557		17	2.31758	2.2372	1.83056		18	4.19418	4.04871	3.3128
10	3.304	2.433	5.39		1.49761	2.08836	2.91214	4.06088		3.66507	5.1108	7.12682	9.9381		19	1.49761	1.41454	1.14873		20	3.66507	3.46176	2.81127
11	4.951	5.63	7.87		2.49739	3.11785	3.89246	4.85951		3.92623	4.90168	6.11947	7.6398		21	2.49739	1.39507	0.967054		22	3.92623	2.19323	1.52034
12	5.325	5.839	8.421		2.43565	2.99375	3.67972	4.52289		3.95546	4.8618	5.97582	7.3451		23	2.43565	1.24407	0.843161		24	3.95546	2.02036	1.36928
13	3.167	2.73	4.246		1.67384	2.36793	3.34983	4.73889		2.7015	3.82172	5.40646	7.64834		25	1.67384	1.67598	1.38906		26	2.7015	2.70496	2.24188
14	6.422	10.066	12.27		4.04044	4.79428	5.68877	6.75015		5.69478	6.75728	8.01801	9.51396		27	4.04044	1.64833	1.06138		28	5.69478	2.32323	1.49595
15	6.927	11.792	14.444		4.682	5.48668	6.42967	7.53472		6.86596	8.04599	9.42883	11.0493		29	4.682	1.74767	1.10505		30	6.86596	2.56288	1.62051
16	13.128	26.072	27.586		6.70129	7.28621	7.9222	8.6137		7.52045	8.17688	8.8906	9.66663		31	6.70129	1.22091	0.691497		32	7.52045	1.37016	0.776025
17	8.013	14.945	16.539		5.62933	6.45654	7.40531	8.4935		6.8683	7.87758	9.03517	10.3629		33	5.62933	1.77598	1.08819		34	6.8683	2.16687	1.32769
18	11.014	22.576	23.847		7.02874	7.766	8.58058	9.48061		7.8885	8.71594	9.63016	10.6403		35	7.02874	1.55184	0.900028		36	7.8885	1.74166	1.01012
19	4.943	8.762	10.92		4.71313	5.88618	7.3512	9.18085		7.2931	9.10829	11.3753	14.2065		37	4.71313	2.63808	1.82965		38	7.2931	4.08216	2.8312
20	3.744	7.02	8.662		4.86257	6.52082	8.74457	11.7267		7.53935	10.1104	13.5583	18.182		39	4.86257	3.882	2.9821		40	7.53935	6.01898	4.6237
21	5.275	10.118	12.248		5.52806	6.80804	8.38439	10.3257		8.27822	10.195	12.5556	15.4627		41	5.52806	2.85634	1.94135		42	8.27822	4.27734	2.90715
22	3.045	4.169	6.944		2.74104	3.93193	5.64021	8.09069		6.81869	9.78118	14.0308	20.1266		43	2.74104	2.89917	2.45048		44	6.81869	7.21207	6.09588
23	17.434	43.624	44.584		11.4641	12.2098	13.0039	13.8498		12.1131	12.901	13.7401	14.6338		45	11.4641	1.53983	0.84582		46	12.1131	1.627	0.893701
24	8.305	17.985	21.021		7.6391	8.71951	9.95272	11.3604		11.0104	12.5676	14.3451	16.374		47	7.6391	2.31362	1.40763		48	11.0104	3.33468	2.02885
25	11.003	28.189	30.054		11.7293	12.9609	14.3218	15.8256		13.8959	15.3549	16.9672	18.7488		49	11.7293	2.59251	1.50381		50	13.8959	3.07137	1.78158
26	8.178	20.439	22.098		10.6433	12.1736	13.9239	15.9258		13.037	14.9114	17.0554	19.5076		51	10.6433	3.28058	2.00196		52	13.037	4.01839	2.4522
27	6.764	17.154	19.429		10.7365	12.63	14.8573	17.4775		15.0292	17.6796	20.7975	24.4653		53	10.7365	4.1208	2.62016		54	15.0292	5.76835	3.66774
28	13.062	35.165	37.099		13.5726	14.7635	16.059	17.4681		15.7386	17.1196	18.6218	20.2557		55	13.5726	2.48638	1.40911		56	15.7386	2.88317	1.63398
29	11.159	31.145	33.159		14.7696	16.2976	17.9838	19.8444		17.6909	19.5212	21.5409	23.7695		57	14.7696	3.21422	1.86061		58	17.6909	3.84997	2.22862
30	5.011	13.172	14.698		11.127	13.8546	17.2508	21.4795		15.0881	18.7867	23.3918	29.1259		59	11.127	6.12375	4.22869		60	15.0881	8.30373	5.73405
31	11.872	33.808	35.352		15.7237	17.2482	18.9205	20.755		17.9076	19.6438	21.5484	23.6376		61	15.7237	3.19679	1.83444		62	17.9076	3.64079	2.08922
32	5.642	15.527	17.064		12.9012	15.6745	19.0441	23.1381		16.941	20.5829	25.0076	30.3835		63	12.9012	6.14296	4.09394		64	16.941	8.06656	5.37591
33	17.539	50.36	53.098		16.588	17.6602	18.8018	20.0172		19.3906	20.644	21.9785	23.3992		65	16.588	2.21386	1.21538		66	19.3906	2.5879	1.42072
34	14.092	39.736	42.653		15.5148	16.7728	18.1327	19.6029		19.0829	20.6301	22.3028	24.1111		67	15.5148	2.61786	1.47019		68	19.0829	3.21991	1.8083
35	8.037	23.73	25.267		16.7082	19.1556	21.9614	25.1783		20.2295	23.1926	26.5898	30.4847		69	16.7082	5.25324	3.21686		70	20.2295	6.36037	3.89482
36	12.817	38.521	40.546		18.5366	20.1955	22.003	23.9721		21.7093	23.6522	25.7689	28.0752		71	18.5366	3.46637	1.96918		72	21.7093	4.05967	2.30622
37	10.902	33.215	34.936		19.0281	21.0455	23.2769	25.7448		22.282	24.6444	27.2573	30.1472		73	19.0281	4.24877	2.46791		74	22.282	4.97532	2.88993
38	4.562	11.964	14.166		10.8235	13.7706	17.5202	22.2907		17.5385	22.3141	28.3899	36.1202		75	10.8235	6.6967	4.77056		76	17.5385	10.8514	7.73029
39	10.975	34.45	37.133		20.8812	23.0797	25.5096	28.1953		26.664	29.4713	32.5741	36.0036		77	20.8812	4.62833	2.68572		78	26.664	5.91009	3.4295
40	9.181	27.025	30.016		16.8427	18.9837	21.3968	24.1166		23.329	26.2945	29.637	33.4043		79	16.8427	4.55408	2.71986		80	23.329	6.30791	3.76731
41	7.047	20.663	22.919		16.059	18.7683	21.9347	25.6352		22.1184	25.8499	30.2109	35.3077		81	16.059	5.87561	3.70053		82	22.1184	8.09257	5.09679
42	12.368	38.834	41.17		21.1375	23.101	25.2469	27.5921		25.5318	27.9035	30.4955	33.3283		83	21.1375	4.10939	2.34523		84	25.5318	4.96369	2.83277
43	12.788	40.165	42.928		21.2196	23.1232	25.1975	27.4579		26.3373	28.7	31.2746	34.0802		85	21.2196	3.97789	2.26041		86	26.3373	4.93728	2.80558
44	11.293	35.84	38.546		21.6794	23.8945	26.3358	29.0266		27.5494	30.3642	33.4666	36.8859		87	21.6794	4.65637	2.69078		88	27.5494	5.91714	3.41934
45	9.724	31.063	33.472		21.7908	24.3972	27.3153	30.5824		27.9167	31.2558	34.9943	39.1799		89	21.7908	5.52449	3.26715		90	27.9167	7.07756	4.18563
46	6.671	21.24	23.991		20.4758	24.1415	28.4633	33.5588		30.9269	36.4635	42.9913	50.6876		91	20.4758	7.98745	5.09554		92	30.9269	12.0643	7.69636
47	5.917	18.906	21.613		20.2779	24.4151	29.3964	35.394		32.0413	38.5785	46.4495	55.9264		93	20.2779	9.11849	5.99761		94	32.0413	14.4082	9.47688
48	6.402	20.994	23.481		22.3692	26.5569	31.5285	37.4309		32.9884	39.1641	46.4959	55.2003		95	22.3692	9.15935	5.9024		96	32.9884	13.5075	8.70442
49	3.811	12.265	13.47		18.7284	24.986	33.3344	44.4722		25.6933	34.2781	45.7311	61.011		97	18.7284	14.606	11.1378		98	25.6933	20.0378	15.2798
50	7.225	23.788	26.959		23.1131	26.9089	31.328	36.4729		35.8482	41.7354	48.5895	56.5691		99	23.1131	8.21495	5.1449		100	35.8482	12.7413	7.97968
51	7.394	27.054	28.815		33.4593	38.8191	45.0374	52.2519		42.4572	49.2583	57.1489	66.3034		101	33.4593	11.5781	7.21443		102	42.4572	14.6917	9.15454
52	8.873	30.985	34.311		29.0274	32.8534	37.1837	42.0847		42.228	47.794	54.0935	61.2234		103	29.0274	8.1563	4.90106		104	42.228	11.8655	7.12989
53	7.555	27.088	29.588		31.1877	36.0692	41.7148	48.244		43.4205	50.2167	58.0766	67.1667		105	31.1877	10.527	6.52919		106	43.4205	14.6561	9.09013
54	5.656	20.615	22.257		31.5182	38.2752	46.4808	56.4457		42.1348	51.1679	62.1376	75.459		107	31.5182	14.9627	9.96483		108	42.1348	20.0028	13.3214

## Sheet: Updated IRT parameters
SWYC Milestone question	Updated IRT parameters				Ages at which each % of parents are expected to report that children at least "somewhat" pass milestone					Ages at which each % of parents are expected to report that children "very much" pass milestone
	beta	alpha1	alpha2		0.25	0.5	0.75	0.9		0.25	0.5	0.75	0.9
1	2.321	-0.89	0.442		0.424522	0.681502	1.09404	1.75631		0.753595	1.20978	1.9421	3.11773
2	5.995	-0.299	1.478		0.792051	0.951348	1.14268	1.3725		1.06533	1.27959	1.53694	1.84605
3	3.982	-2	1.444		0.459253	0.605161	0.797427	1.05078		1.09061	1.43711	1.89369	2.49533
4	3.324	-1.32	2.033		0.483057	0.672259	0.935567	1.30201		1.32459	1.8434	2.56542	3.57023
5	2.874	-0.371	2.454		0.599687	0.878896	1.2881	1.88783		1.60256	2.3487	3.44224	5.04491
6	2.284	0.099	2.081		0.645546	1.0443	1.68936	2.73287		1.53744	2.48711	4.02339	6.50862
7	3.723	1.121	3.478		1.00603	1.35135	1.81519	2.43824		1.89478	2.54516	3.41877	4.59224
8	2.936	0.107	3.027		0.713379	1.03712	1.50777	2.19201		1.92863	2.80385	4.07627	5.92611
9	3.252	3.832	5.761		2.31758	3.24901	4.55479	6.38534		4.19418	5.87981	8.2429	11.5557
10	3.304	2.433	5.39		1.49761	2.08836	2.91214	4.06088		3.66507	5.1108	7.12682	9.9381
11	4.951	5.63	7.87		2.49739	3.11785	3.89246	4.85951		3.92623	4.90168	6.11947	7.6398
12	5.325	5.839	8.421		2.43565	2.99375	3.67972	4.52289		3.95546	4.8618	5.97582	7.3451
13	3.167	2.73	4.246		1.67384	2.36793	3.34983	4.73889		2.7015	3.82172	5.40646	7.64834
14	6.422	10.066	12.27		4.04044	4.79428	5.68877	6.75015		5.69478	6.75728	8.01801	9.51396
15	6.927	11.792	14.444		4.682	5.48668	6.42967	7.53472		6.86596	8.04599	9.42883	11.0493
16	13.128	26.072	27.586		6.70129	7.28621	7.9222	8.6137		7.52045	8.17688	8.8906	9.66663
17	8.013	14.945	16.539		5.62933	6.45654	7.40531	8.4935		6.8683	7.87758	9.03517	10.3629
18	11.014	22.576	23.847		7.02874	7.766	8.58058	9.48061		7.8885	8.71594	9.63016	10.6403
19	4.943	8.762	10.92		4.71313	5.88618	7.3512	9.18085		7.2931	9.10829	11.3753	14.2065
20	3.744	7.02	8.662		4.86257	6.52082	8.74457	11.7267		7.53935	10.1104	13.5583	18.182
21	5.275	10.118	12.248		5.52806	6.80804	8.38439	10.3257		8.27822	10.195	12.5556	15.4627
22	3.045	4.169	6.944		2.74104	3.93193	5.64021	8.09069		6.81869	9.78118	14.0308	20.1266
23	17.434	43.624	44.584		11.4641	12.2098	13.0039	13.8498		12.1131	12.901	13.7401	14.6338
24	8.305	17.985	21.021		7.6391	8.71951	9.95272	11.3604		11.0104	12.5676	14.3451	16.374
25	11.003	28.189	30.054		11.7293	12.9609	14.3218	15.8256		13.8959	15.3549	16.9672	18.7488
26	8.178	20.439	22.098		10.6433	12.1736	13.9239	15.9258		13.037	14.9114	17.0554	19.5076
27	6.764	17.154	19.429		10.7365	12.63	14.8573	17.4775		15.0292	17.6796	20.7975	24.4653
28	13.062	35.165	37.099		13.5726	14.7635	16.059	17.4681		15.7386	17.1196	18.6218	20.2557
29	11.159	31.145	33.159		14.7696	16.2976	17.9838	19.8444		17.6909	19.5212	21.5409	23.7695
30	5.011	13.172	14.698		11.127	13.8546	17.2508	21.4795		15.0881	18.7867	23.3918	29.1259
31	11.872	33.808	35.352		15.7237	17.2482	18.9205	20.755		17.9076	19.6438	21.5484	23.6376
32	5.642	15.527	17.064		12.9012	15.6745	19.0441	23.1381		16.941	20.5829	25.0076	30.3835
33	17.539	50.36	53.098		16.588	17.6602	18.8018	20.0172		19.3906	20.644	21.9785	23.3992
34	14.092	39.736	42.653		15.5148	16.7728	18.1327	19.6029		19.0829	20.6301	22.3028	24.1111
35	8.037	23.73	25.267		16.7082	19.1556	21.9614	25.1783		20.2295	23.1926	26.5898	30.4847
36	12.817	38.521	40.546		18.5366	20.1955	22.003	23.9721		21.7093	23.6522	25.7689	28.0752
37	10.902	33.215	34.936		19.0281	21.0455	23.2769	25.7448		22.282	24.6444	27.2573	30.1472
38	4.562	11.964	14.166		10.8235	13.7706	17.5202	22.2907		17.5385	22.3141	28.3899	36.1202
39	10.975	34.45	37.133		20.8812	23.0797	25.5096	28.1953		26.664	29.4713	32.5741	36.0036
40	9.181	27.025	30.016		16.8427	18.9837	21.3968	24.1166		23.329	26.2945	29.637	33.4043
41	7.047	20.663	22.919		16.059	18.7683	21.9347	25.6352		22.1184	25.8499	30.2109	35.3077
42	12.368	38.834	41.17		21.1375	23.101	25.2469	27.5921		25.5318	27.9035	30.4955	33.3283
43	12.788	40.165	42.928		21.2196	23.1232	25.1975	27.4579		26.3373	28.7	31.2746	34.0802
44	11.293	35.84	38.546		21.6794	23.8945	26.3358	29.0266		27.5494	30.3642	33.4666	36.8859
45	9.724	31.063	33.472		21.7908	24.3972	27.3153	30.5824		27.9167	31.2558	34.9943	39.1799
46	6.671	21.24	23.991		20.4758	24.1415	28.4633	33.5588		30.9269	36.4635	42.9913	50.6876
47	5.917	18.906	21.613		20.2779	24.4151	29.3964	35.394		32.0413	38.5785	46.4495	55.9264
48	6.402	20.994	23.481		22.3692	26.5569	31.5285	37.4309		32.9884	39.1641	46.4959	55.2003
49	3.811	12.265	13.47		18.7284	24.986	33.3344	44.4722		25.6933	34.2781	45.7311	61.011
50	7.225	23.788	26.959		23.1131	26.9089	31.328	36.4729		35.8482	41.7354	48.5895	56.5691
51	7.394	27.054	28.815		33.4593	38.8191	45.0374	52.2519		42.4572	49.2583	57.1489	66.3034
52	8.873	30.985	34.311		29.0274	32.8534	37.1837	42.0847		42.228	47.794	54.0935	61.2234
53	7.555	27.088	29.588		31.1877	36.0692	41.7148	48.244		43.4205	50.2167	58.0766	67.1667
54	5.656	20.615	22.257		31.5182	38.2752	46.4808	56.4457		42.1348	51.1679	62.1376	75.459

## Sheet: SESAW_exp
SWYC, old	beta	alpha1	alpha2		beta	alpha1	alpha2
1									DEVAGE	BY
2										LNAGE	1	0	999	999
3										MSF9	2.988	0.367	8.148	0
4										MSF10	2.946	0.374	7.878	0
5										MSF11	4.211	0.579	7.277	0
6										MSF12	5.054	0.781	6.474	0
7					orginal SESAW					MSF13	2.264	0.252	8.972	0
8										MSF14	6.681	1.156	5.777	0
9	2.988	2.811	4.395							MSF15	5.304	0.78	6.797	0
10	2.946	1.858	4.699							MSF16	9.123	1.693	5.388	0
11	4.211	4.441	6.473							MSF17	6.274	0.944	6.647	0
12	5.054	5.919	7.826							MSF18	8.221	1.594	5.158	0
13	2.264	2.094	3.554							MSF19	5.663	0.667	8.488	0
14	6.681	10.064	12.023							MSF20	3.774	0.387	9.759	0
15	5.304	7.854	10.324		5.733	7.902	11.353			MSF21	3.132	0.284	11.013	0
16	9.123	17.625	18.577		4.283	6.263	7.469			MSF22	2.647	0.245	10.794	0
17	6.274	11.459	12.839		3.971	3.167	6.19			MSF23	12.565	2.854	4.403	0
18	8.221	15.499	16.76		5.271	8.695	10.197			MSF24	3.546	0.319	11.111	0
19	5.663	10.06	12.212		3.252	4.387	6.316			MSF25	9.814	1.846	5.315	0
20	3.774	7.221	8.755		3.482	5.992	7.529			MSF26	6.864	0.988	6.948	0
21	3.132	5.623	7.525		6.113	11.02	13.754			MSF27	6.081	0.591	10.287	0
22	2.647	3.737	6.456		2.878	3.319	6.316			MSF28	11.088	1.69	6.563	0
23	12.565	30.952	31.824		6.764	15.515	16.048			MSF29	10.455	1.43	7.311	0
24	3.546	6.999	9.44		9.672	19.406	23.482			MSF30	4.241	0.558	7.596	0
25	9.814	25.536	26.991		5.438	12.771	14.286			MSF31	7.277	0.673	10.813	0
26	6.864	17.406	19.116		4.792	10.602	12.204			MSF32	5.613	0.798	7.032	0
27	6.081	15.724	17.272		3.232	6.764	9.167			MSF33	12.904	1.972	6.543	0
28	11.088	30.195	31.245		8.688	22.563	23.926			MSF34	6.8	0.64	10.62	0
29	10.455	29.637	31.263		8.452	22.898	24.796			MSF35	7.93	0.791	10.02	0
30	4.241	11.53	12.834		3.743	9.448	10.674			MSF36	7.797	0.973	8.013	0
31	7.277	20.904	22.138		10.24	28.309	29.94			MSF37	7.522	0.754	9.972	0
32	5.613	15.662	17.17		2.543	6.283	7.355			MSF38	4.702	0.475	9.909	0
33	12.904	37.363	39.579		13.139	36.11	38.597			MSF39	7.403	0.736	10.063	0
34	6.8	18.878	21.009		14.138	38.77	42.289			MSF40	6.44	0.58	11.103	0
35	7.93	23.752	25.24		5.223	14.603	15.883			MSF41	10.379	1.063	9.76	0
36	7.797	23.902	25.23		7.611	21.904	23.611			MSF42	11.416	1.224	9.323	0
37	7.522	23.097	24.502		10.326	30.823	32.734			MSF43	12.541	1.301	9.638	0
38	4.702	13.513	15.63		3.718	9.997	12.11			MSF44	10.568	1.152	9.174	0
39	7.403	22.055	24.77		7.215	20.435	23.819			MSF45	9.207	0.855	10.772	0
40	6.44	19.784	21.901		2.247	4.491	7.078			MSF46	6.14	0.59	10.409	0
41	10.379	33.465	35.441		7.544	23.023	25.12			MSF47	5.446	0.529	10.289	0
42	11.416	36.583	39.311		10.805	33.079	37.035			MSF48	4.458	0.491	9.078	0
43	12.541	41.25	44.033		6.667	20.542	23.019			MSF49	6.662	0.687	9.692	0
44	10.568	34.685	37.293		8.302	25.918	28.98			MSF50	7.859	0.751	10.469	0
45	9.207	30.371	32.461		4.536	13.642	15.766			MSF51	7.469	0.962	7.76	0
46	6.14	20.535	22.349		5.178	15.782	18.491			MSF52	7.252	0.884	8.207	0
47	5.446	18.34	20.596		3.352	10.501	12.806			MSF53	7.553	0.991	7.623	0
48	4.458	15.62	16.656		3.89	12.571	15.266			MSF54	6.03	0.711	8.479	0
49	6.662	23.02	25.302		3.065	9.568	10.679
50	7.859	26.85	29.781		5.772	19.262	22.414			Means
51	7.469	28.1	29.21		6.137	21.798	23.399			DEVAGE	2.874	0.041	70.32	0
52	7.252	26.605	28.967		6.258	21.339	24.764
53	7.553	27.955	30.404		8.592	30.194	35.041			Intercepts
54	6.03	22.645	24.338		4.304	15.478	17.247			LNAGE	0	0	999	999
										Thresholds
										MSF9$1	2.811	0.567	4.954	0	1
										MSF10$1	1.858	0.553	3.358	0.001	1
										MSF11$1	4.441	0.854	5.2	0	1
										MSF12$1	5.919	1.059	5.589	0	1
										MSF13$1	2.094	0.447	4.68	0	1
										MSF14$1	10.064	1.828	5.506	0	1
										MSF15$1	7.854	1.386	5.666	0	1
										MSF16$1	17.625	3.458	5.097	0	1
										MSF17$1	11.459	1.917	5.977	0	1
										MSF18$1	15.499	3.285	4.718	0	1
										MSF19$1	10.06	1.294	7.775	0	1
										MSF20$1	7.221	0.871	8.293	0	1
										MSF21$1	5.623	0.679	8.282	0	1
										MSF22$1	3.737	0.541	6.909	0	1
										MSF23$1	30.952	7.03	4.403	0	1
										MSF24$1	6.999	0.742	9.429	0	1
										MSF25$1	25.536	4.877	5.236	0	1
										MSF26$1	17.406	2.547	6.834	0	1
										MSF27$1	15.724	1.592	9.875	0	1
										MSF28$1	30.195	4.665	6.472	0	1
										MSF29$1	29.637	4.148	7.144	0	1
										MSF30$1	11.53	1.843	6.256	0	1
										MSF31$1	20.904	2.035	10.272	0	1
										MSF32$1	15.662	2.523	6.208	0	1
										MSF33$1	37.363	5.808	6.433	0	1
										MSF34$1	18.878	1.874	10.075	0	1
										MSF35$1	23.752	2.465	9.637	0	1
										MSF36$1	23.902	3.112	7.682	0	1
										MSF37$1	23.097	2.439	9.469	0	1
										MSF38$1	13.513	1.564	8.641	0	1
										MSF39$1	22.055	2.355	9.365	0	1
										MSF40$1	19.784	1.938	10.209	0	1
										MSF41$1	33.465	3.544	9.442	0	1
										MSF42$1	36.583	4.023	9.094	0	1
										MSF43$1	41.25	4.341	9.503	0	1
										MSF44$1	34.685	3.875	8.952	0	1
										MSF45$1	30.371	2.912	10.43	0	1
										MSF46$1	20.535	2.068	9.929	0	1
										MSF47$1	18.34	1.884	9.736	0	1
										MSF48$1	15.62	1.745	8.954	0	1
										MSF49$1	23.02	2.431	9.469	0	1
										MSF50$1	26.85	2.646	10.149	0	1
										MSF51$1	28.1	3.61	7.784	0	1
										MSF52$1	26.605	3.258	8.167	0	1
										MSF53$1	27.955	3.684	7.588	0	1
										MSF54$1	22.645	2.64	8.577	0	1
										MSF9$2	4.395	0.654	6.724	0	2
										MSF10$2	4.699	0.655	7.173	0	2
										MSF11$2	6.473	0.956	6.773	0	2
										MSF12$2	7.826	1.279	6.117	0	2
										MSF13$2	3.554	0.45	7.897	0	2
										MSF14$2	12.023	2.022	5.947	0	2
										MSF15$2	10.324	1.55	6.661	0	2
										MSF16$2	18.577	3.521	5.277	0	2
										MSF17$2	12.839	1.974	6.504	0	2
										MSF18$2	16.76	3.429	4.887	0	2
										MSF19$2	12.212	1.448	8.434	0	2
										MSF20$2	8.755	0.932	9.394	0	2
										MSF21$2	7.525	0.749	10.052	0	2
										MSF22$2	6.456	0.667	9.677	0	2
										MSF23$2	31.824	7.223	4.406	0	2
										MSF24$2	9.44	0.833	11.33	0	2
										MSF25$2	26.991	5.044	5.351	0	2
										MSF26$2	19.116	2.669	7.163	0	2
										MSF27$2	17.272	1.662	10.393	0	2
										MSF28$2	31.245	4.751	6.577	0	2
										MSF29$2	31.263	4.281	7.303	0	2
										MSF30$2	12.834	1.845	6.955	0	2
										MSF31$2	22.138	2.067	10.709	0	2
										MSF32$2	17.17	2.547	6.741	0	2
										MSF33$2	39.579	6.009	6.587	0	2
										MSF34$2	21.009	1.955	10.744	0	2
										MSF35$2	25.24	2.535	9.955	0	2
										MSF36$2	25.23	3.147	8.017	0	2
										MSF37$2	24.502	2.479	9.882	0	2
										MSF38$2	15.63	1.634	9.567	0	2
										MSF39$2	24.77	2.483	9.977	0	2
										MSF40$2	21.901	2.01	10.896	0	2
										MSF41$2	35.441	3.634	9.753	0	2
										MSF42$2	39.311	4.203	9.353	0	2
										MSF43$2	44.033	4.527	9.726	0	2
										MSF44$2	37.293	4.046	9.218	0	2
										MSF45$2	32.461	3.003	10.809	0	2
										MSF46$2	22.349	2.143	10.43	0	2
										MSF47$2	20.596	1.97	10.454	0	2
										MSF48$2	16.656	1.773	9.394	0	2
										MSF49$2	25.302	2.536	9.976	0	2
										MSF50$2	29.781	2.819	10.564	0	2
										MSF51$2	29.21	3.659	7.982	0	2
										MSF52$2	28.967	3.423	8.463	0	2
										MSF53$2	30.404	3.869	7.859	0	2
										MSF54$2	24.338	2.733	8.905	0	2

## Sheet: MN_exp
	beta	alpha1	alpha2		beta	alpha1	alpha2
1					original				DEVAGE	BY
2										LNAGE	1	0	999	999
3										MSF9	5.36	0.365	14.69	0
4										MSF10	3.803	0.364	10.443	0
5										MSF11	4.051	0.375	10.791	0
6										MSF12	5.996	0.557	10.756	0
7										MSF13	4.501	0.629	7.16	0
8										MSF14	6.591	0.403	16.363	0
9	5.36	7.645	9.753		5.097	7.007	9.116			MSF15	6.76	0.209	32.342	0
10	3.803	3.092	6.248		3.611	2.632	5.788			MSF16	14.13	0.547	25.84	0
11	4.051	3.79	6.127		3.882	3.359	5.699			MSF17	9.013	0.246	36.704	0
12	5.996	6.737	9.634		5.678	5.987	8.882			MSF18	11.175	0.332	33.641	0
13	4.501	3.291	5.837		4.13	2.501	5.041			MSF19	4.786	0.224	21.355	0
14	6.591	10.378	12.667		6.267	9.594	11.883			MSF20	3.945	0.139	28.472	0
15	6.76	11.475	14.021		6.512	10.818	13.365			MSF21	6.064	0.181	33.467	0
16	14.13	27.771	29.441		13.696	26.57	28.246			MSF22	3	0.129	23.2	0
17	9.013	16.854	18.474		8.744	16.098	17.724			MSF23	23.283	1.383	16.832	0
18	11.175	22.701	23.931		10.851	21.79	23.024			MSF24	8.572	0.213	40.218	0
19	4.786	8.138	10.518		4.585	7.608	9.986			MSF25	13.394	0.431	31.071	0
20	3.945	7.506	9.334		3.764	7.032	8.859			MSF26	8.873	0.241	36.749	0
21	6.064	11.951	14.355		5.802	11.26	13.661			MSF27	7.392	0.274	26.959	0
22	3	3.874	7.018		2.866	3.523	6.666			MSF28	11.434	0.465	24.58	0
23	23.283	57.789	58.909		22.258	55.07	56.194			MSF29	10.837	0.316	34.272	0
24	8.572	18.318	21.694		8.188	17.311	20.681			MSF30	5.251	0.204	25.754	0
25	13.394	34.336	36.591		12.686	32.47	34.726			MSF31	11.668	0.396	29.489	0
26	8.873	22.25	23.94		8.394	20.991	22.679			MSF32	6.866	0.233	29.508	0
27	7.392	19.035	21.463		7.021	18.063	20.492			MSF33	16.081	0.582	27.62	0
28	11.434	30.501	32.372		10.832	28.921	30.791			MSF34	13.813	0.462	29.926	0
29	10.837	30.174	32.186		10.268	28.682	30.693			MSF35	8.912	0.445	20.027	0
30	5.251	14.024	15.654		4.998	13.368	14.998			MSF36	13.85	0.692	20.018	0
31	11.668	33.271	34.821		11.085	31.753	33.303			MSF37	11.093	0.53	20.946	0
32	6.866	19.225	20.99		6.549	18.409	20.177			MSF38	4.467	0.292	15.287	0
33	16.081	46.182	49.022		15.259	44.04	46.877			MSF39	9.568	0.517	18.495	0
34	13.813	38.918	42.106		13.098	37.051	40.234			MSF40	6.537	0.398	16.405	0
35	8.912	26.603	28.346		8.446	25.386	27.125			MSF41	11.153	0.598	18.651	0
36	13.85	42.11	44.266		13.205	40.465	42.622			MSF42	14.38	0.812	17.707	0
37	11.093	34.084	35.861		10.52	32.59	34.362			MSF43	11.948	0.546	21.876	0
38	4.467	11.71	14.061		4.237	11.112	13.462			MSF44	11.591	0.506	22.903	0
39	9.568	29.359	32.742		9.108	28.26	31.64			MSF45	10.444	0.465	22.462	0
40	6.537	19.323	21.972		6.238	18.622	21.272			MSF46	7.262	0.275	26.381	0
41	11.153	35.728	37.936		10.629	34.489	36.696			MSF47	6.637	0.289	22.98	0
42	14.38	46.542	49.81		13.712	44.973	48.241			MSF48	6.558	0.278	23.625	0
43	11.948	38.794	41.655		11.319	37.241	40.092			MSF49	3.244	0.338	9.602	0
44	11.591	37.808	41.026		10.994	36.348	39.556			MSF50	7.576	0.447	16.935	0
45	10.444	34.115	36.761		9.897	32.767	35.404			MSF51	8.458	0.585	14.464	0
46	7.262	23.774	26.799		6.924	22.988	26.014			MSF52	10.375	0.698	14.87	0
47	6.637	21.936	24.926		6.288	21.073	24.057
48	6.558	21.952	24.62		6.218	21.115	23.778			Means
49	3.244	10.385	11.512		3.098	10.057	11.183			DEVAGE	2.832	0.005	550.044	0
50	7.576	25.525	28.825		7.208	24.661	27.957
51	8.458	31.596	33.513		8.139	30.976	32.9			Intercepts
52	10.375	37.169	40.772		9.975	36.367	39.984			LNAGE	0	0	999	999
53
54										Thresholds
										MSF9$1	7.645	0.661	11.561	0	1
										MSF10$1	3.092	0.678	4.561	0	1
										MSF11$1	3.79	0.676	5.609	0	1
										MSF12$1	6.737	0.992	6.791	0	1
										MSF13$1	3.291	1.138	2.891	0.004	1
										MSF14$1	10.378	0.729	14.238	0	1
										MSF15$1	11.475	0.405	28.327	0	1
										MSF16$1	27.771	1.094	25.385	0	1
										MSF17$1	16.854	0.485	34.732	0	1
										MSF18$1	22.701	0.695	32.666	0	1
										MSF19$1	8.138	0.518	15.701	0	1
										MSF20$1	7.506	0.337	22.291	0	1
										MSF21$1	11.951	0.422	28.347	0	1
										MSF22$1	3.874	0.324	11.964	0	1
										MSF23$1	57.789	3.454	16.731	0	1
										MSF24$1	18.318	0.496	36.947	0	1
										MSF25$1	34.336	1.125	30.518	0	1
										MSF26$1	22.25	0.635	35.037	0	1
										MSF27$1	19.035	0.755	25.207	0	1
										MSF28$1	30.501	1.29	23.643	0	1
										MSF29$1	30.174	0.902	33.447	0	1
										MSF30$1	14.024	0.604	23.224	0	1
										MSF31$1	33.271	1.16	28.686	0	1
										MSF32$1	19.225	0.686	28.006	0	1
										MSF33$1	46.182	1.704	27.105	0	1
										MSF34$1	38.918	1.338	29.09	0	1
										MSF35$1	26.603	1.381	19.269	0	1
										MSF36$1	42.11	2.146	19.618	0	1
										MSF37$1	34.084	1.66	20.538	0	1
										MSF38$1	11.71	0.912	12.845	0	1
										MSF39$1	29.359	1.74	16.87	0	1
										MSF40$1	19.323	1.381	13.991	0	1
										MSF41$1	35.728	2.038	17.529	0	1
										MSF42$1	46.542	2.745	16.957	0	1
										MSF43$1	38.794	1.887	20.556	0	1
										MSF44$1	37.808	1.763	21.446	0	1
										MSF45$1	34.115	1.629	20.943	0	1
										MSF46$1	23.774	0.985	24.126	0	1
										MSF47$1	21.936	1.039	21.108	0	1
										MSF48$1	21.952	1.002	21.898	0	1
										MSF49$1	10.385	1.26	8.242	0	1
										MSF50$1	25.525	1.635	15.609	0	1
										MSF51$1	31.596	2.21	14.299	0	1
										MSF52$1	37.169	2.587	14.368	0	1
										MSF9$2	9.753	0.682	14.305	0	2
										MSF10$2	6.248	0.673	9.286	0	2
										MSF11$2	6.127	0.686	8.938	0	2
										MSF12$2	9.634	1.004	9.598	0	2
										MSF13$2	5.837	1.119	5.217	0	2
										MSF14$2	12.667	0.761	16.637	0	2
										MSF15$2	14.021	0.433	32.348	0	2
										MSF16$2	29.441	1.136	25.924	0	2
										MSF17$2	18.474	0.507	36.443	0	2
										MSF18$2	23.931	0.718	33.345	0	2
										MSF19$2	10.518	0.526	19.994	0	2
										MSF20$2	9.334	0.343	27.197	0	2
										MSF21$2	14.355	0.444	32.366	0	2
										MSF22$2	7.018	0.322	21.775	0	2
										MSF23$2	58.909	3.506	16.804	0	2
										MSF24$2	21.694	0.537	40.37	0	2
										MSF25$2	36.591	1.169	31.307	0	2
										MSF26$2	23.94	0.653	36.672	0	2
										MSF27$2	21.463	0.781	27.473	0	2
										MSF28$2	32.372	1.324	24.444	0	2
										MSF29$2	32.186	0.931	34.59	0	2
										MSF30$2	15.654	0.615	25.468	0	2
										MSF31$2	34.821	1.181	29.474	0	2
										MSF32$2	20.99	0.705	29.768	0	2
										MSF33$2	49.022	1.766	27.752	0	2
										MSF34$2	42.106	1.396	30.168	0	2
										MSF35$2	28.346	1.412	20.076	0	2
										MSF36$2	44.266	2.204	20.083	0	2
										MSF37$2	35.861	1.695	21.16	0	2
										MSF38$2	14.061	0.93	15.124	0	2
										MSF39$2	32.742	1.816	18.027	0	2
										MSF40$2	21.972	1.402	15.668	0	2
										MSF41$2	37.936	2.087	18.175	0	2
										MSF42$2	49.81	2.858	17.425	0	2
										MSF43$2	41.655	1.943	21.437	0	2
										MSF44$2	41.026	1.821	22.529	0	2
										MSF45$2	36.761	1.67	22.008	0	2
										MSF46$2	26.799	1.022	26.234	0	2
										MSF47$2	24.926	1.074	23.202	0	2
										MSF48$2	24.62	1.032	23.86	0	2
										MSF49$2	11.512	1.268	9.08	0	2
										MSF50$2	28.825	1.694	17.012	0	2
										MSF51$2	33.513	2.255	14.859	0	2
										MSF52$2	40.772	2.694	15.134	0	2

[truncated: 10 more sheets: RI_exp, MN_Pr, MN_LB, MN_UB, SESAW_Pr, SESAW_LB, SESAW_UB, RI_Pr, RI_LB, RI_UB]
